# Supplementary material for: A low level of CD16pos monocytes in SARS-CoV-2 infected patients is a marker of severity
Source: publisher site journal article supplement (doi:10.1515/cclm-2020-1801), 2021-02-20
Supplement: Supplementary file 1 [file j_cclm-2020-1801_suppl.docx]

Table S1: Main biological data (except for monocytes and their subpopulation) of the entire population and of the different groups of patients.

|  | All | Home | CoU | CoU then ICU | ICU |
| --- | --- | --- | --- | --- | --- |
| n | 390 | 70 | 265 | 20 | 35 |
| WBC, ×109/L  [4.0 – 11.0] | 6.5  [1.2 – 22.0] | 5.2  [1.2 -12.8] | 6.7 c  [1.3 – 22.0] | 5.2 d  [2.5 – 11.1] | 9.3 c, f  [1.7 -20.6] |
| PMN, ×109/L  [1.5 – 7.5]  > 7.5 G/L (%) | 4.7  [0.3 – 16.6]  (21.8) | 3.4  [0.3 – 10. 5]  (10.0) | 4.9 c  [0.8 – 16.6]  (21.5) a | 4  [1.7 – 7.9]  (5.0) | 8.4 c, f  [0.8 – 16.1]  (60.0) c, f |
| tot-Ly, ×109/L  [1,00 – 4,00]  < 1,00 G/L (%) | 0.96  [0.07 -12.10]  (51.3) | 1.10  [0.07 – 3.14]  (37.1) | 0.96  [0.07 – 12.10]  (50.9) | 0.81a  [0.33 – 1.58]  (70.0) a | 0.76 c, e  [0.20 – 4.06]  (65.7) a |
| B-Ly, ×109/L  [0.10 -0.40]  < 0.10 G/L (%) | 0.10  [< 0.01 – 11.2]  (51.3) | 0.10  [0.02 – 0.41]  (51.4) | 0.09  [< 0.01 – 11.2]  (50.6) | 0.11  [0.01 – 0.28]  (30.0) | 0.13  [0.02 – 0.88]  (37.1) |
| T-Ly, ×109/L  [0.90 – 2.35]  < 0.90 G/L (%) | 0.83  [0.17 – 3.19]  (54.1) | 1.02  [0.19 – 3.04]  (34.3) | 0.83 b  [0.2 – 2.69]  (54.7) b | 0.66 b  [0,.28 – 1.38]  (75.0) b | 0.56 c, f  [0.17 – 3.19]  (77.1) c ,° |
| ncT-Ly, ×109/L  [0.78 – 1.96]  < 0.78 G/L (%) | 0.65  [0.1 – 2.99]  (63.6) | 0.88  [0.12 – 2.81]  (37.1) | 0.64 c  [0.11 – 2.24]  (64.9) c | 0.53 c  [0.16 – 1.03]  (80.0) b | 0.50 c, e  [0.1 – 2.99]  (88.6) c, e |
| cNK-Ly, ×109/L  [0.11 -0.42]  < 0.11 G/L | 0.15  [0.02 – 0.91]  (35.9) | 0.13  [0.03 – 0.84]  (30.0) | 0.17  [0.02 – 0.91]  (32.5) | 0.15  [0.02 – 0.35]  (40.0) | 0.08 b  f  [0.02 – 0.33]  (62.9) b, f |
| CRP, mg/L (n)  [< 5] | 78 (344)  [< 5 – 479] | 11 (63)  [< 5 – 182] | 84 c (231)  [< 5 – 428] | 91 c (19)  [8 – 409] | 189 (31) c, f  [15 – 479] |
| D-Dimers, mg/L (n)  [< 0.50] | 0.78 (173)  [< 0.12 – 98.47] | 0.37 (34)  [< 0.12 – 2.83] | 0.81 c (108)  [< 0.12 – 42.88] | 1.01 (11) b  [0.27 – 20.9] | 11.00 (20) c, f  [0.34 – 98.47] |

Lymphocyte subpopulations were determined using CytoDiff™ analysis. Results are expressed in median and [range]. When values were missing, the number between brackets next to the median indicate the number (n) of patients for whom the information was available. The number between brackets, under the range, indicates the frequency (in percentage) of patients for whom the threshold, indicated in the left column, was reached. CoU, hospitalization in conventional units; cNK-Ly, cytotoxic/Natural Killer lymphocytes; CRP, C-reactive protein; ICU, intensive care unit; Ly, lymphocytes ; ncT-Ly, non cytotoxic T-Ly; PMN, polymorphonuclear cells; tot-, total; WBC, white blood cells. a p < 0.05; b p < 0.01; c p < 0.001 vs. *“*Home” group; d p < 0.05; e p < 0.01 *;* f p < 0.001 vs. CoU group.

Table S2: Comparisons of biological data of survivors and non-survivors.

|  | Survivors | Non-survivors | p | AUC |
| --- | --- | --- | --- | --- |
| n | 289 | 54 |  |  |
| WBC, ×109/L | 6.4  [1.2 – 22.4] | 7.8  [1.3 -20.6] | ns | nc |
| PMN, ×109/L | 4.6  [0.3 – 16.6] | 6.3  [0.8 – 15. 5] | 0.017 | 0.610 |
| tot-Ly, ×109/L | 0.98  [0.07 -12.1] | 0.67  [0.07 – 1.63] | < 0.001 | 0.677 |
| B-Ly, ×109/L | 0.10  [< 0.01 – 11.20] | 0.08  [0.02 – 0.62] | 0.017 | 0.608 |
| T-Ly, ×109/L | 0.84  [0.17 – 3.19] | 0.60  [0.18 – 1.55] | < 0.001 | 0.674 |
| ncT-Ly, ×109/L | 0.66  [0.1 – 2.99] | 0.44  [0.15 – 1.16] | < 0.001 | 0.686 |
| cNK-Ly, ×109/L | 0.14  [0.02 – 0.91] | 0.12  [0.02 – 0.71] | ns | nc |
| tot-Mono, ×109/L | 0.44  [0.02 – 7.00] | 0.37  [0.01 – 1.64] | 0.015 | 0.610 |
| CD16neg Mono, ×109/L | 0.38  [0.01 – 6.89] | 0.34  [0.01 – 1.32] | 0.023 | 0.603 |
| CD16pos Mono, ×109/L | 0.056  [0.003- 0.548] | 0.038  [0.002 – 0.329] | 0.013 | 0.613 |
| [CD16pos Mono/Tot-Mono] | 12.1  [1 – 80.3] | 12.1  [1.6 – 93.8] | ns | nc |
| [CD16neg Mono/CD16pos Mono] | 7.3  [0.3 – 89.8] | 7.5  [1.1 – 58.3] | ns | nc |
| [PMN/CD16pos Mono] | 78  [2 – 2,640] | 151  [7.1 – 10,333] | 0.004 | 0.630 |
| CRP, mg/L (n) | 79 (224)  [< 5 – 479] | 124 (46)  [7.7 – 428] | < 0.001 | 0.668 |
| D-Dimers, mg/L (n) | 0.80 (117)  [< 0.12 – 98.47] | 2.49 (20)  [0.27– 60.51] | < 0.001 | 0.740 |

Numeric results are expressed in median and [range]. When values were missing, the number between brackets next to the median indicate the number (n) of patients for whom the information was available. cNK-Ly, cytotoxic/Natural Killer lymphocytes; CRP, C-reactive protein; Ly, lymphocytes; nc, not calculated; ncT-Ly, non cytotoxic T-Ly; ns, not significant; PMN, polymorphonuclear cells; tot-, total; WBC, white blood cells.
